# Supplementary material for: An effective molecular approach for assessing cereal aphid-parasitoid-endosymbiont networks
Source: Springer Nature journal article supplement (doi:10.1038/s41598-017-02226-w), 2017-06-05
Supplement: MOESM1 [file 41598_2017_2226_MOESM1_ESM.pdf]

1 **An effective molecular approach for assessing cereal aphid-parasitoid-endosymbiont networks**

2

3

4 Zhengpei Ye<sup>1\*</sup>, Ines Vollhardt<sup>2</sup>, Susanne Girtler<sup>1</sup>, Corinna Wallinger<sup>1</sup>, Zeljko Tomanovic<sup>3</sup> & Michael  
5 Traugott<sup>1</sup>

6 <sup>1</sup> *Mountain Agriculture Research Unit, Institute of Ecology, University of Innsbruck, Austria*

7 <sup>2</sup> *Agroecology, Department of Crop Sciences, Georg-August-University Göttingen, Germany*

8 <sup>3</sup> *Institute of Zoology, Faculty of Biology, University of Belgrade, Serbia*

9

10

11 **\*Corresponding author:**

12 Zhengpei Ye

13 Mountain Agriculture Research Unit, Institute of Ecology, University of Innsbruck, Technikerstrasse

14 25, 6020 Innsbruck, Austria

15 Phone: +43 (0)512 507-51676, Fax: +43 (0)512 507-51799; E-Mail: [Zhengpei.Ye@uibk.ac.at](mailto:Zhengpei.Ye@uibk.ac.at)

16

## 17 **Appendix S1: unexpected PCR products in 16SMP and their interpretation**

18 The *Dendrocerus* forward primer and the shared reserve primer ParG-A462 produce an additional  
19 149/150 bp amplicon when DNA of *Dendrocerus* was present. This amplicon is similar in size to the  
20 *Aphelinus*-hyperparasitoid PCR product ( $155 \pm 2$  bp). This side band, however, does not corrupt the  
21 detection of either *Aphelinus* parasitoids or hyperparasitoids, because the samples, which score  
22 *Aphelinus*-hyperparasitoid- or *Dendrocerus*-positive, are subjected to the second step HypMP assay  
23 anyway. Secondly, all *Dendrocerus* spp. parasitoid samples provide a weak and unexpected side band  
24 which is of similar size as the one for *S. avenae* (259 bp). However, this side band, which is only  
25 amplified at the presence of a large amount of *Dendrocerus* DNA, such as in a DNA extract of an  
26 adult parasitoid, does not cause problems for correct aphid species identification: if this *Dendrocerus*  
27 side band occurs together with the bands specific for one of the two other aphid species (*R. padi* and  
28 *M. dirhodum*, respectively), the individual can be identified as the respective aphid species. In case of  
29 *S.avenae*, there may just be a thicker band comprising both the *S.avenae* specific band and the  
30 sideband.

31

## 32 **Appendix S2: Morphological identification keys**

33 The parasitoids were morphologically identified by specialists using multiple taxonomic keys<sup>1-15</sup>.

34

## 35 **Appendix S3: General primers and PCR conditions used to generate COI, 16S and 18S** 36 **sequences**

37 The 18S sequences of aphids and parasitoids were amplified and sequenced using the general primers  
38 18SL0001 and 18SR1100<sup>16</sup>. The 16S sequences of aphids and parasitoids were amplified and  
39 sequenced using general primers ‘5’-CGCCGTTTTATCAAAAACATGT-3’’, a modification of the  
40 LR-N-13398 primer<sup>17</sup> by Kambhampati, et al. <sup>18</sup> and LR-J-13017<sup>19</sup> or LR-N13398 version ‘5’-  
41 CACCTGTTTATCAAAAACAT-3’’<sup>17</sup> and LR-J12888 version ‘5’-  
42 TCGATTTGAACTCARATCATGTA-3’’<sup>20</sup>. The COI fragments of aphids and parasitoids were  
43 amplified and sequenced using the general invertebrate primers LCO-1490 and HCO-2198<sup>21</sup>. For PCR,  
44 10 µl reactions contained 1.5 µl template DNA, 5 µl of 2 × Multiplex PCR Master Mix (Qiagen,

45 Hilden, Germany), 1  $\mu$ M of each of the respective primers and PCR-water to adjust the volume. The  
46 PCRs were carried out in a Master Cycler Gradient (Eppendorf, Hamburg, Germany) using the  
47 following thermocycling conditions: 95 °C for 15 min, 35 cycles of 94 °C for 30 s, 50 °C for 90 s,  
48 72 °C for 60 s, and a final extension of 72 °C for 10 min. PCR products were visualized on 1.5 %  
49 agarose gels, purified with ExoSap-IT (Amersham Biosciences, Glattbrugg, Switzerland) following  
50 the manufacturer's instructions, and sent to Eurofins MWG Operon (Ebersberg, Germany) for bi-  
51 directional sequencing.

52

### 53 **Appendix S4: Multiplex PCR assay sensitivity testing and primer balancing**

54 Parasitism experiment: Live *S. avenae* (host) and *L. testaceipes* (parasitoid) were obtained from Katz  
55 Biotech AG. Aphids were kept on young wheat plants inside fine mesh cages in a climate chamber  
56 ( $\sim 25 \pm 1$  °C, 12:12h L:D), separated from a colony of *L. testaceipes* maintained on *S. avenae* at similar  
57 conditions. Unparasitised *S. avenae* nymphs were individually placed in 1.5 ml centrifuge tubes with  
58 one female *L. testaceipes*. After oviposition was observed, the aphids were transferred onto a fresh  
59 young wheat plant inside a mesh cage in the climate chamber. To test how early parasitoid DNA can  
60 be detected within the aphids, batches of at least 15 parasitised aphids each were collected from the  
61 plants at 1 h, 1 d, 2 d, 3 d, 5 d, and 7d post-parasitism, and individually frozen at -80°C. Additionally,  
62 15 un-parasitised aphids and 15 parasitoids were frozen to serve as negative and positive controls in  
63 the molecular testing, respectively.

64 Generating standardised DNA templates: For determining the sensitivity of the MP-PCR assays and  
65 balancing amplification efficiencies between primer pairs, standardised DNA templates of each  
66 targeted taxon were generated following the approach described in Sint, et al. <sup>22</sup>. 16S templates of  
67 *Aphidius ervi*, *Lysiphlebus testaceipes*, *Aphidius rhopalosiphi*, *Alloxysta victrix*, *Asaphes suspensus*,  
68 *Asaphes vulgaris* and *Coruna clavata* were amplified using the general primers LR-N13889 '5'-  
69 CACCTGTTTATCAAAAACAT-3''<sup>17</sup> and LR-J12888 '5'-TCGATTTGAACTCARATCATGTA-  
70 3''<sup>20</sup>. For the facultative endosymbionts *Hamiltonella defensa* and *Regiella insecticola*, 16S templates  
71 were amplified using the modified general forward and reverse primers for facultative aphid  
72 endosymbionts, 10F '5'-GAGTTTGATCATGGCTCAGATTG-3''<sup>23</sup> and 35R<sup>24</sup>, respectively. 16S

73 templates of the facultative endosymbiont pea aphid X-type symbiont (PAXS) were amplified by the  
74 newly designed forward primer PAXS-S494 ‘5’-GGCACGTAGGCGGTTTC-3’ and the already  
75 published reverse primer 35R<sup>24</sup>. COI templates of cereal aphids (*Sitobion avenae*, *Rhopalosiphum padi*  
76 and *Metopolophium dirhodum*) and parasitoids (*A. ervi*, *Aphidius avenae*, *Aphidius uzbekistanicus*,  
77 *Ephedrus plagiator*, *Praon gallicum*, *Praon volucre*, *Dendrocerus carpenteri* and  
78 *Phaenoglyphis villosa*) were amplified using the general invertebrate primers LCO-1490 and HCO-  
79 2198<sup>21</sup>. For PCR, 20 µl reactions contained 3 µl template DNA, 10 µl of 2 × Multiplex PCR Master  
80 Mix (Qiagen, Hilden, Germany), 2 µM of each of the respective primers and PCR-water to adjust the  
81 volume. The PCRs were carried out in a Master Cycler Gradient (Eppendorf, Hamburg, Germany)  
82 using the following thermocycling conditions: 95 °C for 15 min, 35 cycles of 94 °C for 30 s, 50 °C for  
83 90 s, 72 °C for 60 s, and a final extension of 72 °C for 10 min. PCR template concentrations were  
84 standardised and serially diluted to 10,000, 5,000, 1,000, 500, 100, 50, 10 and 5 double-stranded DNA  
85 templates/µl.

86 To test the sensitivity of the first step MP-PCRs, the aphids from the parasitism experiment  
87 were checked for parasitoid DNA to confirm parasitisation success, using a PCR protocol allowing to  
88 detect a freshly inserted parasitoid egg already<sup>25</sup>. All aphid samples which were tested positive in this  
89 assay were deemed to contain a parasitoid egg or larva.

90 The two first step MP-PCR assays were tested with the *L. testaceipes*-positive samples, using 10  
91 replicates per time point post parasitism. Afterwards, the sensitivities of the three parasitoid primer  
92 pairs employed in the 16SMP were balanced using standardised DNA templates (for the 18SMP this  
93 was not done as only one parasitoid primer pair is included). First, the number of *L. testaceipes* DNA  
94 templates that allow the detection of eggs of this parasitoid species by the Aphidiinae primer pair was  
95 determined; thereafter, the sensitivities of *Aphelinus*-hyperparasitoid and *Dendrocerus* spp. group-  
96 specific primer pairs were adjusted to the same sensitivity as the Aphidiinae primer pair by adjusting  
97 the primers’ concentrations using DNA templates of *A. suspensus* and *D. carpenteri*, respectively. As  
98 *L. testaceipes* is not a common species in the experimental region, the 16SMP was also tested with  
99 known numbers of DNA templates of *A. ervi* to assure that the Aphidiinae primer pair has similar  
100 sensitivity for different Aphidiinae species. For the sensitivity-testing of species-specific parasitoid

101 identification in the second step MP-PCR assays, the minimum number of template DNA per target  
102 species detectable was determined. For the *Aphidius* spp. genus-specific primer pair 16S templates of  
103 *A. rhopalosiphi* were used.

104 For the facultative endosymbiont and aphid specific primers included in the two first step MP-  
105 PCR assays, the process of sensitivity testing and primer balancing was conducted using the same  
106 strategy as described above. To check if facultative endosymbiont DNA is detectable in mummified  
107 aphids, 10 aphid mummies each from both a *H. defensa*-infected and a *H. defensa*-free population of  
108 *A. pisum* were tested with the two first-step MP-PCR assays. To test if facultative endosymbiont DNA  
109 is detectable even after the parasitoid adult emerges, five *H. defensa*-infected mummified *A. pisum*  
110 samples were kept until the parasitoid adult emerged. Thereafter, the empty mummy and the  
111 respective adult parasitoid were DNA-extracted as one sample. These five samples were tested with  
112 the two first step MP-PCR assays. After the determination of the minimum number of DNA template  
113 of *H. defensa* detectable by these assays, the concentrations of *R. insecticola* and PAXS primer pairs  
114 were adjusted accordingly to obtain similar detection sensitivity.

115 To ensure high assay sensitivity for the detection of parasitoids and facultative endosymbionts  
116 in the first step MP-PCRs, the concentration of the aphid primers was reduced to avoid that these  
117 primers dominate the PCR when high concentrations of aphid DNA is present in the sample, i.e. when  
118 a freshly parasitised/endosymbiont infected aphid is examined.

119

## 120 **Appendix S5: Multiplex PCR assay specificity testing**

121 The specificity of the MP-PCR assays was tested with the targeted aphid, parasitoid and endosymbiont  
122 species. All aphids were checked for the presence of endosymbiont DNA according to Ferrari, et al. <sup>26</sup>,  
123 with *Serratia symbiotica* as a non-target. Additionally, the first step MP-PCR assays were tested for  
124 primer generality with at least two individuals of each family of the non-cereal aphid parasitoids,  
125 except with only one specimen for Trichogrammatidae. In the second step MP-PCR assays, the three  
126 cereal aphids, 28 less common parasitoids, as well as four facultative endosymbionts were used for  
127 non-target testing.

128           Generally, at least three individuals per species were used for specificity testing, for the  
129 parasitoids *Aphelinus asychis*, *Aphelinus varipes*, *Aphidius rosae*, *Alloxysta brachyptera* and  
130 *Dendrocerus laticeps*. For *Toxares deltiger*, *Alloxysta pedestris* (n = 2), and *Pachyneuron formosum*  
131 (n = 1). In addition, two PCR products per target taxon of field-collected samples were sequenced to  
132 confirm the species identity. Only one PCR product each was obtained for *Asaphes suspensus* and  
133 *Coruna clavata*, respectively, and no pea aphid X-type symbiont (PAXS) at all.

134

135

136 **Table S1:** Number of amplicons generated in non-cereal aphid parasitoids using the first MP-PCR assays (18SMP and 16SMP).

| Organism group | Family                      | Species                               | Number of individuals | Number of positive amplicons |                                           |                    |
|----------------|-----------------------------|---------------------------------------|-----------------------|------------------------------|-------------------------------------------|--------------------|
|                |                             |                                       |                       | General parasitoid (18SMP)   | <i>Aphelinus</i> -Hyperparasitoid (16SMP) | Aphidiinae (16SMP) |
| Parasitoids    | Braconidae                  | <i>Apanteles subandinus</i>           | 1                     | 1                            |                                           |                    |
|                |                             | <i>Chorebus</i> sp.                   | 1                     | 1                            |                                           |                    |
|                |                             | <i>Cotesia glomerata</i>              | 1                     | 1                            | 1                                         |                    |
|                |                             | <i>Cotesia rubecula</i>               | 1                     | 1                            | 1                                         |                    |
|                |                             | <i>Dolichogenidea gelechiidivoris</i> | 1                     |                              |                                           | 1                  |
|                |                             | <i>Microplitis mediator</i>           | 1                     | 1                            |                                           | 1                  |
|                |                             | <i>Opius dissitus</i>                 | 1                     |                              |                                           |                    |
|                |                             | <i>Orgilus lepidus</i>                | 1                     | 1                            | 1                                         |                    |
|                |                             | <i>Phaedrotoma scabriventris</i>      | 1                     | 1                            |                                           |                    |
|                |                             | unidentified                          | 1                     |                              |                                           |                    |
|                | Ceraphronidae               | <i>Aphanogmus</i> sp.                 | 1                     | 1                            |                                           |                    |
|                |                             | <i>Ceraphronus</i> sp.                | 1                     |                              |                                           |                    |
|                | Diapriidae                  | unidentified                          | 2                     | 2                            |                                           |                    |
|                | Encyrtidae                  | <i>Copidosoma koehleri</i>            | 1                     | 1                            | 1                                         |                    |
|                |                             | unidentified                          | 1                     | 1                            | 1                                         |                    |
|                | Eucoilidae                  | unidentified                          | 2                     | 2                            |                                           |                    |
|                | Eulophidae                  | <i>Chrysocharis caribea</i>           | 1                     | 1                            |                                           |                    |
|                |                             | <i>Chrysocharis flacilla</i>          | 1                     | 1                            | 1                                         |                    |
|                |                             | <i>Diglyphus</i> sp.                  | 1                     | 1                            | 1                                         |                    |
|                |                             | <i>Diglyphus websteri</i>             | 1                     | 1                            | 1                                         |                    |
|                |                             | <i>Pnigalio</i> sp.                   | 1                     | 1                            | 1                                         |                    |
|                |                             | unidentified                          | 2                     | 2                            | 2                                         |                    |
|                | Eurytomidae                 | unidentified                          | 2                     | 2                            | 2                                         |                    |
| unidentified   |                             | 2                                     | 2                     | 2                            |                                           |                    |
| Ichneumonidae  | <i>Aritranis director</i>   | 1                                     | 1                     |                              |                                           |                    |
|                | <i>Diadegma semiclausum</i> | 1                                     | 1                     | 1                            |                                           |                    |

---

|                      |                   |                             |   |   |   |
|----------------------|-------------------|-----------------------------|---|---|---|
|                      |                   | unidentified                | 2 | 1 |   |
|                      | Megaspillidae     | <i>Archiphauurus</i> sp.    | 1 | 1 |   |
|                      |                   | <i>Conostigmus</i> sp.      | 1 | 1 |   |
|                      | Mymaridae         | unidentified                | 2 | 2 |   |
|                      | Platygastridae    | <i>Euxestonotus</i> sp.     | 1 | 1 |   |
|                      |                   | <i>Leptacis</i> sp.         | 1 |   |   |
|                      | Proctotrupidae    | Unidentified                | 2 | 1 | 2 |
|                      | Pteromalidae      | <i>Halticoptera arduine</i> | 1 | 1 | 1 |
|                      |                   | unidentified                | 2 | 2 | 2 |
|                      | Scelionidae       | <i>Trissolcus</i> spp.      | 3 | 3 |   |
|                      | Trichogrammatidae | <i>Trichogramma</i> sp.     | 1 | 1 | 1 |
| Other<br>Hymenoptera | Apidae            | <i>Apis mellifera</i>       | 1 | 1 |   |
|                      |                   | <i>Bombus pascuorum</i>     | 1 | 1 | 1 |
|                      | Symphyla          | unidentified                | 1 | 1 |   |
|                      | Vespidae          | <i>Polistes dominula</i>    | 1 | 1 |   |

---



138 **Table S2:** Five parasitoid groups have no between species distances within group on partial 16S  
 139 sequences, which are generated using the 16S general parasitoid primers in 16SMP. Non-cereal aphid  
 140 parasitoids are marked with \*; parasitoid species which attack cereal aphids on their winter plant host  
 141 are marked with \*\*.

| Trophic level      | Family/Subfamily | Species-group                                                                                                                                   |
|--------------------|------------------|-------------------------------------------------------------------------------------------------------------------------------------------------|
| Primary Parasitoid | Aphelinidae      | <i>Aphelinus chaonia</i> & <i>Aphelinus varipes</i>                                                                                             |
|                    | Aphidiinae       | <i>Aphidius ervi</i> , <i>Aphidius microlophii</i> *, <i>Aphidius rhopalosiphi</i> , <i>Aphidius urticae</i> * & <i>Aphidius uzbekistanicus</i> |
|                    |                  | <i>Aphidius matricariae</i> & <i>A. urticae</i> *                                                                                               |
|                    |                  | <i>Praon abjectum</i> , <i>Praon bicolor</i> * & <i>Praon volucre</i>                                                                           |
| Hyperparasitoid    | Pteromalidae     | <i>Pachyneuron muscarum</i> & <i>Pachyneuron solitarium</i>                                                                                     |

142

143

144 **Table S3:** Taxonomic authorities of the organisms used in this study.

| Organism group           | Family          | Species/Genus                  | Taxonomic authority             |             |
|--------------------------|-----------------|--------------------------------|---------------------------------|-------------|
| Aphid                    | Aphididae       | <i>Acyrtosiphon pisum</i>      | Harris 1776                     |             |
|                          | Aphididae       | <i>Aphis fabae</i>             | Scopoli 1763                    |             |
|                          | Aphididae       | <i>Metopolophium dirhodum</i>  | Walker 1849                     |             |
|                          | Aphididae       | <i>Rhopalosiphum padi</i>      | L. 1758                         |             |
|                          | Aphididae       | <i>Sitobion avenae</i>         | Fabricius 1775                  |             |
| Aphid primary parasitoid | Aphelinidae     | <i>Aphelinus abdominalis</i>   | Dalman 1820                     |             |
|                          | Aphelinidae     | <i>Aphelinus asychis</i>       | Walker 1839                     |             |
|                          | Aphelinidae     | <i>Aphelinus chaonia</i>       | Walker 1839                     |             |
|                          | Aphelinidae     | <i>Aphelinus mali</i>          | Haldeman 1851                   |             |
|                          | Aphelinidae     | <i>Aphelinus varipes</i>       | Förster 1841                    |             |
|                          | Braconidae      | <i>Adialytus ambiguus</i>      | Haliday 1834                    |             |
|                          | Braconidae      | <i>Aphidius avenae</i>         | Haliday 1834                    |             |
|                          | Braconidae      | <i>Aphidius colemani</i>       | Viereck 1912                    |             |
|                          | Braconidae      | <i>Aphidius ervi</i>           | Haliday 1834                    |             |
|                          | Braconidae      | <i>Aphidius matricariae</i>    | Haliday 1834                    |             |
|                          | Braconidae      | <i>Aphidius microlophii</i>    | Pennacchio & Tremblay 1987      |             |
|                          | Braconidae      | <i>Aphidius rhopalosiphi</i>   | Stefani-Perez 1902              |             |
|                          | Braconidae      | <i>Aphidius rosae</i>          | Haliday 1834                    |             |
|                          | Braconidae      | <i>Aphidius urticae</i>        | Haliday 1834                    |             |
|                          | Braconidae      | <i>Aphidius uzbekistanicus</i> | Luzhetzki 1960                  |             |
|                          | Braconidae      | <i>Binodoxys angelicae</i>     | Haliday 1833                    |             |
|                          | Braconidae      | <i>Diaeretiella rapae</i>      | M'Intosh 1855                   |             |
|                          | Braconidae      | <i>Ephedrus persicae</i>       | Froggatt 1904                   |             |
|                          | Braconidae      | <i>Ephedrus plagiator</i>      | Nees 1811                       |             |
|                          | Braconidae      | <i>Lipolexis gracilis</i>      | Förster 1862                    |             |
|                          | Braconidae      | <i>Lysiphlebus fabarum</i>     | Marshall 1896                   |             |
|                          | Braconidae      | <i>Lysiphlebus testaceipes</i> | Cresson 1880                    |             |
|                          | Braconidae      | <i>Monoctonus crepidis</i>     | Haliday 1834                    |             |
|                          | Braconidae      | <i>Praon abjectum</i>          | Haliday 1833                    |             |
|                          | Braconidae      | <i>Praon bicolor</i>           | Mackauer 1959                   |             |
|                          | Braconidae      | <i>Praon gallicum</i>          | Starý 1971                      |             |
|                          | Braconidae      | <i>Praon longicorne</i>        | Starý 1971                      |             |
|                          | Braconidae      | <i>Praon necans</i>            | Mackauer 1959                   |             |
|                          | Braconidae      | <i>Praon volucre</i>           | Haliday 1833                    |             |
|                          | Braconidae      | <i>Toxares deltiger</i>        | Haliday 1833                    |             |
|                          | Braconidae      | <i>Trioxys auctus</i>          | Haliday 1833                    |             |
|                          | Hyperparasitoid | Encyrtidae                     | <i>Syrphophagus aphidivorus</i> | Mayr 1876   |
|                          |                 | Figitidae                      | <i>Alloxysta brachyptera</i>    | Hartig 1840 |
| Figitidae                |                 | <i>Alloxysta brevis</i>        | Thomson 1862                    |             |
| Figitidae                |                 | <i>Alloxysta fulviceps</i>     | Curtis 1838                     |             |
| Figitidae                |                 | <i>Alloxysta pedestris</i>     | Curtis 1838                     |             |
| Figitidae                |                 | <i>Alloxysta victrix</i>       | Westwood 1833                   |             |
| Figitidae                |                 | <i>Phaenoglyphis villosa</i>   | Hartig 1841                     |             |
| Megaspillidae            |                 | <i>Dendrocerus carpenteri</i>  | Curtis 1829                     |             |

---

|                      |                   |                                       |                |
|----------------------|-------------------|---------------------------------------|----------------|
|                      | Megaspillidae     | <i>Dendrocerus laticeps</i>           | Hedicke 1929   |
|                      | Pteromalidae      | <i>Asaphes suspensus</i>              | Nees 1834      |
|                      | Pteromalidae      | <i>Asaphes vulgaris</i>               | Walker 1834    |
|                      | Pteromalidae      | <i>Coruna clavata</i>                 | Walker 1833    |
|                      | Pteromalidae      | <i>Pachyneuron aphidis</i>            | Bouché 1834    |
|                      | Pteromalidae      | <i>Pachyneuron formosum</i>           | Walker 1833    |
|                      | Pteromalidae      | <i>Pachyneuron muscarum</i>           | L. 1758        |
|                      | Pteromalidae      | <i>Pachyneuron solitarium</i>         | Hartig 1838    |
| non-aphid parasitoid | Braconidae        | <i>Apanteles subandinus</i>           | Blanchard 1947 |
|                      | Braconidae        | <i>Chorebus</i> sp                    | Haliday 1833   |
|                      | Braconidae        | <i>Cotesia glomerata</i>              | L. 1758        |
|                      | Braconidae        | <i>Cotesia rubecula</i>               | Marshall 1885  |
|                      | Braconidae        | <i>Dolichogenidea gelechiidivoris</i> | Marsh 1979     |
|                      | Braconidae        | <i>Microplitis mediator</i>           | Haliday 1834   |
|                      | Braconidae        | <i>Opius dissitus</i>                 | Muesebeck 1963 |
|                      | Braconidae        | <i>Orgilus lepidus</i>                | Muesebeck 1967 |
|                      | Braconidae        | <i>Phaerotoma scabriventris</i>       |                |
|                      | Ceraphronidae     | <i>Aphanogmus</i> sp                  | Thomson 1858   |
|                      | Ceraphronidae     | <i>Ceraphronus</i> sp                 | Jurine 1807    |
|                      | Encyrtidae        | <i>Copidosoma koehleri</i>            | Blanchard 1940 |
|                      | Eulophidae        | <i>Chrysocharis caribea</i>           | Boucek 1977    |
|                      | Eulophidae        | <i>Chrysocharis flacilla</i>          | Walker 1842    |
|                      | Eulophidae        | <i>Diglyphus</i> sp                   | Walker 1844    |
|                      | Eulophidae        | <i>Diglyphus websteri</i>             | Crawford 1912  |
|                      | Eulophidae        | <i>Pnigalio</i> sp                    | Schrank 1802   |
|                      | Ichneumonidae     | <i>Aritranis director</i>             | Thunberg 1824  |
|                      | Ichneumonidae     | <i>Diadegma semiclausum</i>           | Hellén 1949    |
|                      | Megaspillidae     | <i>Archiphanurus</i> sp               |                |
|                      | Megaspillidae     | <i>Conostigmus</i> sp                 | Dahlbom 1858   |
|                      | Platygastridae    | <i>Euxestonotus</i> sp                | Fouts 1925     |
|                      | Platygastridae    | <i>Leptacis</i> sp                    | Foerster 1856  |
|                      | Pteromalidae      | <i>Halticoptera arduine</i>           | Walker 1843    |
|                      | Scelionidae       | <i>Trissolcus</i> sp                  | Ashmead 1893   |
|                      | Trichogrammatidae | <i>Trichogramma</i> sp                | Westwood 1833  |
| other Hymenoptera    | Apidae            | <i>Apis mellifera</i>                 | L. 1758        |
|                      | Apidae            | <i>Bombus pascuorum</i>               | Scopoli 1763   |
|                      | Vespidae          | <i>Polistes dominulus</i>             | Christ 1791    |

---

145

146

147 **Table S4:** Aphid parasitoid and endosymbiont DNA sequences retrieved from GenBank for this study.  
 148 Non-cereal aphid parasitoids are marked with \*; parasitoid species which attack cereal aphids on their  
 149 winter plant host are marked with \*\*.

| Gene | Organism group     | Family/Subfamily               | Species                                                                                                                                                                                                      | GenBank accession number               |                                        |
|------|--------------------|--------------------------------|--------------------------------------------------------------------------------------------------------------------------------------------------------------------------------------------------------------|----------------------------------------|----------------------------------------|
| COI  | Aphid              | Aphididae                      | <i>Metopolophium dirhodum</i>                                                                                                                                                                                | DQ499039, DQ499040, FN868599, KT204426 |                                        |
|      |                    |                                | <i>Rhopalosiphum padi</i>                                                                                                                                                                                    | DQ499056, EU701894, FJ009050, GU457795 |                                        |
|      |                    |                                | <i>Rhopalosiphum padi</i>                                                                                                                                                                                    | HQ979401, KT204427                     |                                        |
|      | Primary Parasitoid | Aphelinidae                    | Aphelinidae                                                                                                                                                                                                  | <i>Aphelinus abdominalis</i>           | FM210123, JX507444                     |
|      |                    |                                |                                                                                                                                                                                                              | <i>Aphelinus varipes</i>               | HQ599571, JX507449, KJ086033, KJ088823 |
|      |                    |                                |                                                                                                                                                                                                              | Aphidiinae                             | Aphidiinae                             |
|      |                    | <i>Aphidius avenae</i>         | EU819392, EU819393, JN164785, JN620545, JN620547, JQ723406, JQ723408                                                                                                                                         |                                        |                                        |
|      |                    | <i>Aphidius colemani</i>       | FM210125, FM210126, JN620548, JN620549, KJ615362, KJ615370-KJ615373                                                                                                                                          |                                        |                                        |
|      |                    | <i>Aphidius ervi</i>           | FM210130, FM210131, FM210132, FM210134, JX507435, KC211025, KC211026, KT706472                                                                                                                               |                                        |                                        |
|      |                    | <i>Aphidius matricariae</i>    | JN620562                                                                                                                                                                                                     |                                        |                                        |
|      |                    | <i>Aphidius microlophii*</i>   | JN620566, JN620568, JX507434,                                                                                                                                                                                |                                        |                                        |
|      |                    | <i>Aphidius rhopalosiphi</i>   | EU819401, EU819402, EU819403-EU819406, JN164753, JN164754, JN164763, JN164777, JN164778, JN620570-JN620572, JX507437, KF597710, KJ088590, KJ615376                                                           |                                        |                                        |
|      |                    | <i>Aphidius rosae*</i>         | JN620580, JN620582                                                                                                                                                                                           |                                        |                                        |
|      |                    | <i>Aphidius urticae*</i>       | JN620590, JX507433, JX507436                                                                                                                                                                                 |                                        |                                        |
|      |                    | <i>Aphidius uzbekistanicus</i> | JN164735, JN164746, JN620594, KF597706                                                                                                                                                                       |                                        |                                        |
|      |                    | <i>Binodoxys angelicae</i>     | JF730315, JN620603                                                                                                                                                                                           |                                        |                                        |
|      |                    | <i>Diaeretiella rapae**</i>    | JF730316                                                                                                                                                                                                     |                                        |                                        |
|      |                    | <i>Diaeretiella rapae**</i>    | JN620613, JN620615, KF802814                                                                                                                                                                                 |                                        |                                        |
|      |                    | <i>Ephedrus plagiator</i>      | JN620623, JN620625, JN620627, JX507443                                                                                                                                                                       |                                        |                                        |
|      |                    | <i>Lipolexis gracilis</i>      | JN620635, JN620636                                                                                                                                                                                           |                                        |                                        |
|      |                    | <i>Lysiphlebus fabarum</i>     | JF730314, JN620645, JN620647, JN620652, JQ723415, JX507442, KC237766-KC237768, KF597685, KF597686, KF597688-KF597690, KF597681, KF597692, KM408522, KP663444, KP663448-KP663450, KP663455-KP663457, KP663459 |                                        |                                        |
|      |                    | <i>Lysiphlebus testaceipes</i> | FM210176, HQ599569, JN620653, JN620655, JX470530, JX470531, JX470533, KC237764, KC237765, KJ087120, KJ090001                                                                                                 |                                        |                                        |
|      |                    | <i>Monoctonus caricis**</i>    | JN620657, JN620658                                                                                                                                                                                           |                                        |                                        |
|      |                    | <i>Monoctonus cerasi</i>       | JX507448                                                                                                                                                                                                     |                                        |                                        |
|      |                    | <i>Monoctonus crepidis*</i>    | JN620660, JN620661, JN620662                                                                                                                                                                                 |                                        |                                        |
|      |                    | <i>Praon abjectum</i>          | KC128669- KC128671                                                                                                                                                                                           |                                        |                                        |
|      |                    | <i>Praon bicolor*</i>          | JN620672                                                                                                                                                                                                     |                                        |                                        |
|      |                    | <i>Praon gallicum</i>          | EU574906, EU819398-EU819400, JN620679                                                                                                                                                                        |                                        |                                        |
|      |                    | <i>Praon volucre</i>           | EU819394-EU819397, JN620687-JN620689, JN620681, KJ698487, KJ698496, KJ698504,                                                                                                                                |                                        |                                        |

|                    |               |           |                                 |                                                                                                    |
|--------------------|---------------|-----------|---------------------------------|----------------------------------------------------------------------------------------------------|
|                    |               |           |                                 | KJ698507                                                                                           |
|                    |               |           | <i>Toxares deltiger</i>         | EU819391, KP663464                                                                                 |
| Hyperparasitoid    | Encyrtidae    |           | <i>Syrphophagus aphidivorus</i> | KF597765, KF597768, KF597770                                                                       |
|                    | Figitidae     |           | <i>Alloxysta brachyptera</i>    | JX507466                                                                                           |
|                    |               |           | <i>Alloxysta circumscripta</i>  | JX507461                                                                                           |
|                    |               |           | <i>Alloxysta fulviceps</i>      | JX507464, JX507469, JX507470                                                                       |
|                    |               |           | <i>Alloxysta macrophadna</i>    | JX507467                                                                                           |
|                    |               |           | <i>Alloxysta pedestris</i>      | JX507472                                                                                           |
|                    |               |           | <i>Alloxysta victrix</i>        | EU819388, JX507475                                                                                 |
|                    |               |           | <i>Phaenoglyphis villosa</i>    | JX507458                                                                                           |
|                    | Megaspillidae |           | <i>Dendrocercus carpenteri</i>  | EU819389, JF906505, JX507452                                                                       |
|                    | Pteromalidae  |           | <i>Asaphes suspensus</i>        | JX507454                                                                                           |
|                    |               |           | <i>Asaphes vulgaris</i>         | EU819407, EU819408, JX507453, KF802812, KF802813, KM556888, KM557440, KM561413, KM565300           |
|                    |               |           | <i>Coruna clavata</i>           | JX507456                                                                                           |
|                    |               |           | <i>Pachyneuron aphidis</i>      | JF906503, JX507457, KF597737, KF597738, KF597739, KF597740, KF597741                               |
| 16S                | Aphid         | Aphididae | <i>Rhopalosiphum padi</i>       | AY745781, U36743                                                                                   |
|                    |               |           | <i>Sitobion avenae</i>          | AY745779, HM117805                                                                                 |
| Primary Parasitoid | Aphelinidae   |           | <i>Aphelinus asychis</i>        | AF289137, AF289138                                                                                 |
|                    |               |           | <i>Aphelinus varipes</i>        | AF289135, AF289136                                                                                 |
|                    |               |           | <i>Aphidius avenae</i>          | JQ240491, KP983098                                                                                 |
|                    |               |           | <i>Aphidius colemani</i>        | AF289145, JQ240494, KP983101                                                                       |
|                    |               |           | <i>Aphidius ervi</i>            | AF174310, AF176067, AF289147, GU237126, JQ240499                                                   |
|                    |               |           | <i>Aphidius matricariae</i>     | AF289148, GU237127, JQ240509                                                                       |
|                    |               |           | <i>Aphidius microlophii*</i>    | JQ240513, KP983113                                                                                 |
|                    |               |           | <i>Aphidius rhopalosiphi</i>    | JQ240517, KP982944                                                                                 |
|                    |               |           | <i>Aphidius rosae*</i>          | AF003478, JQ240529, KP983125                                                                       |
|                    |               |           | <i>Aphidius urticae*</i>        | JQ240539, KP982956                                                                                 |
|                    |               |           | <i>Aphidius uzbekistanicus</i>  | JQ240541, KP983140                                                                                 |
|                    |               |           | <i>Binodoxys angelicae</i>      | AF174334, JQ240549                                                                                 |
|                    |               |           | <i>Diaeretiella rapae**</i>     | AF174315, AF289143, AY194244, AY194245, AY194248, AY194251, AY194252, JQ240559, KP982970           |
|                    |               |           | <i>Ephedrus persicae**</i>      | AF174348                                                                                           |
|                    |               |           | <i>Ephedrus plagiator</i>       | AF176068, JQ240571, KP982994                                                                       |
|                    |               |           | <i>Lipolexis gracilis</i>       | AF174338, AF176063, JQ240581                                                                       |
|                    |               |           | <i>Lysiphlebus fabarum</i>      | AF174321, AJ005426, AY207558, JQ240592, JQ240594, JQ240596, KJ848488, KP983024, KP983043           |
|                    |               |           | <i>Lysiphlebus testaceipes</i>  | AF174323, AF289142, AY207560, AY498557, AY745773, AY745774                                         |
|                    |               |           | <i>Monoctonus crepidis*</i>     | AF174339, JQ240604                                                                                 |
|                    |               |           | <i>Praon bicolor*</i>           | JQ240614, KP983155                                                                                 |
|                    |               |           | <i>Praon gallicum</i>           | EU574898, JQ240620                                                                                 |
|                    |               |           | <i>Praon necans</i>             | AF174353                                                                                           |
|                    |               |           | <i>Praon volucre</i>            | AF174352, JQ240624, JQ240626, JQ240630, KJ848490, KP983046, KP983063, KP983070, KP983074, KP983076 |

|     |                    |               |                                |                                                                               |
|-----|--------------------|---------------|--------------------------------|-------------------------------------------------------------------------------|
|     | Endosymbiont       |               | <i>Buchnera aphidicola</i>     | AY518294, AY849937, FJ357459-FJ357466                                         |
|     |                    |               | <i>Hamiltonella defensa</i>    | AF293616, AY136141, AY296733, FJ357491, FJ357493, FJ655537, FJ655538          |
|     |                    |               | pea aphid X-type symbiont      | FJ821502, FJ821502                                                            |
|     |                    |               | <i>Regiella insecticola</i>    | AY296734, AY462102, AY907547, DQ010008, FJ357495, FJ357497, FJ357498          |
|     |                    |               | <i>Serratia symbiotica</i>     | AB522706, FJ655518, FJ655519, FJ655521, FJ655523-FJ655525, FJ655530, FJ655531 |
| 18S | Aphid              | Aphididae     | <i>Metopolophium dirhodum</i>  | KT204362                                                                      |
|     |                    |               | <i>Rhopalosiphum padi</i>      | KT204363, U27825                                                              |
|     |                    |               | <i>Sitobion avenae</i>         | KT204364                                                                      |
|     | Primary Parasitoid | Aphelinidae   | <i>Aphelinus asychis</i>       | JN623060                                                                      |
|     |                    | Aphidiinae    | <i>Adialytus ambiguus</i>      | AJ009317                                                                      |
|     |                    |               | <i>Aphidius colemani</i>       | AJ009318                                                                      |
|     |                    |               | <i>Aphidius ervi</i>           | AJ009321                                                                      |
|     |                    |               | <i>Aphidius matricariae</i>    | AJ009324                                                                      |
|     |                    |               | <i>Aphidius rhopalosiphi</i>   | KT204373                                                                      |
|     |                    |               | <i>Aphidius rosae</i> *        | AJ009325                                                                      |
|     |                    |               | <i>Binodoxys angelicae</i>     | AJ009349                                                                      |
|     |                    |               | <i>Diaeretiella rapae</i> **   | AJ009323                                                                      |
|     |                    |               | <i>Ephedrus persicae</i> **    | AJ009329                                                                      |
|     |                    |               | <i>Lipolexis gracilis</i>      | AJ009334                                                                      |
|     |                    |               | <i>Lysiphlebus fabarum</i>     | AJ009332                                                                      |
|     |                    |               | <i>Lysiphlebus testaceipes</i> | AJ009335, AY216698                                                            |
|     |                    |               | <i>Praon volucre</i>           | AJ009347                                                                      |
|     | Hyperparasitoid    | Megaspillidae | <i>Dendrocerus carpenteri</i>  | AY918978                                                                      |
|     |                    | Pteromalidae  | <i>Asaphes suspensus</i>       | JN623355                                                                      |
|     |                    |               | <i>Coruna clavata</i>          | JN623453                                                                      |
|     |                    |               | <i>Pachyneuron formosum</i>    | JN623464                                                                      |

150

151

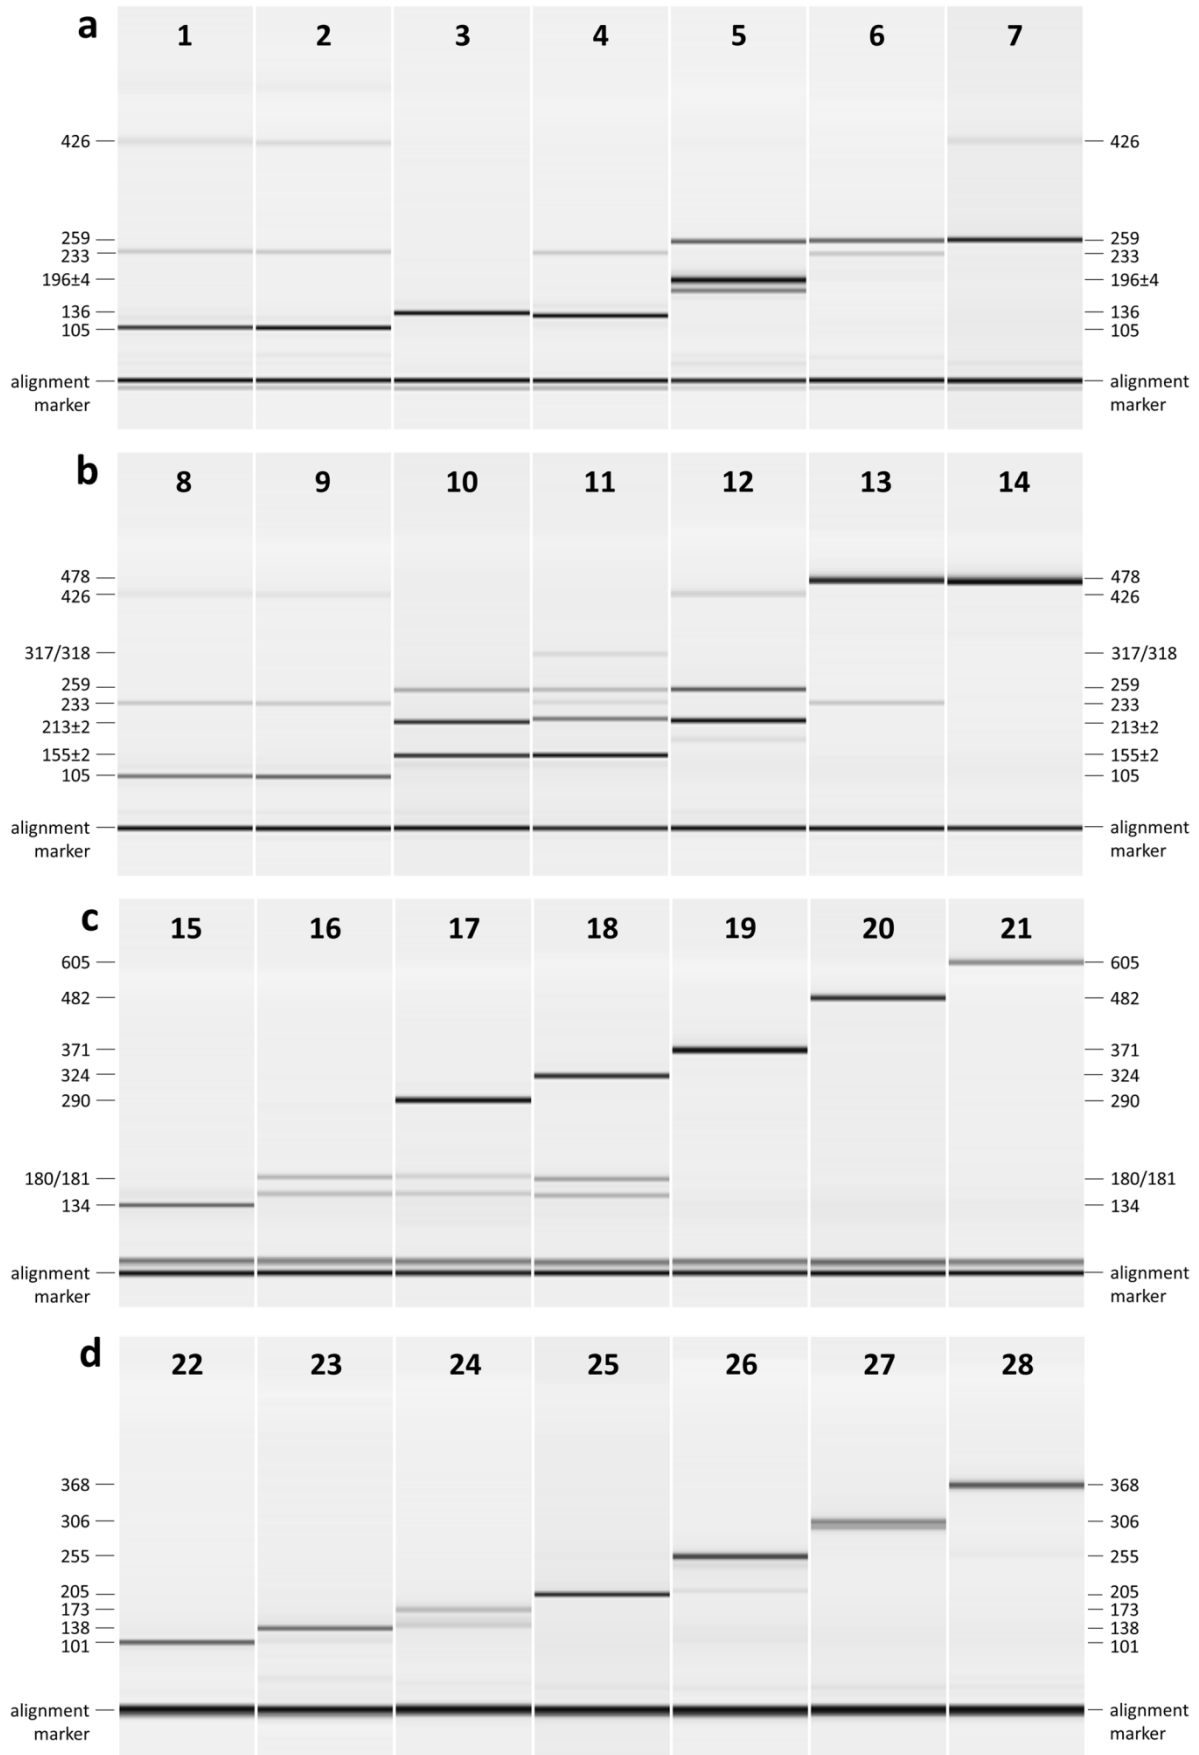

152

153 **Figure S1:** Qiaxcel gel view of amplicons generated by the diagnostic multiplex PCR assays from the  
 154 field sample tests. The leftmost and rightmost numbers shows the amplicon lengths in base pairs. a)

155 Amplicons generated by 18SMP using aphid samples: *Metopolophium dirhodum* (1-2),  
 156 *Rhopalosiphum padi* (3-4) and *Sitobion avenae* (5-7). b) Amplicons generated by 16SMP using aphid  
 157 samples: *Metopolophium dirhodum* (8-9), *Sitobion avenae* (10-12) and *Rhopalosiphum padi* (13-14). c)  
 158 Amplicons generated by PriMP using the aphid samples scored positive of Aphidiinae in 16SMP.  
 159 Samples tested positive with *Ephedrus plagiator* (15), *Aphidius* spp. (16), *Aphidius uzbekistanicus*  
 160 (17), *Aphidius ervi* (18), *Praon volucre* (19), *Praon gallicum* (20) and *Aphidius avenae* (21). d)  
 161 Amplicons generated by HypMP using the aphid samples scored positive of either *Aphelinus*-  
 162 hyperparasitoid or *Dendrocerus* in 16SMP. Samples tested positive *Alloxysta victrix* (22), *Asaphes*  
 163 *suspensus* (23), *Asaphes vulgaris* (24), *Dendrocerus carpenteri* (25), *Coruna clavata* (26),  
 164 *Phaenoglyphis villosa* (27) and *Aphelinus abdominalis* (28).

165

## 166 References

- 167 1 Fergusson, N. D. M. in *Handbooks for the Identification of British Insects* Vol. Vol. 8, Part 1c  
 168 (eds P. C. Barnard & R. R. Askew) 1-55 (Royal Entomological Society of London, 1986).  
 169 2 Fergusson, N. D. M. A revision of the British species of *Dendrocerus* Ratzeburg  
 170 (Hymenoptera: Ceraphronoidea) with a review of their biology as aphid hyperparasites.  
 171 *Bulletin of the British Museum of Natural History (Entomology)* **41**, 255-314 (1980).  
 172 3 Gibson, G. A. P. The Australian species of *Pachyneuron* Walker (Hymenoptera: Chalcidoidea:  
 173 Pteromalidae). *Journal of Hymenoptera Research* **10**, 29-54 (2001).  
 174 4 Gibson, G. A. P. & Vikberg, V. The species of *Asaphes* Walker from America north of  
 175 Mexico, with remarks on extralimital distributions and taxa (Hymenoptera: Chalcidoidea,  
 176 Pteromalidae). *Journal of Hymenoptera Research* **7**, 209-256 (1998).  
 177 5 Kamijo, K. & Takada, H. Aphid hyperparasites of the Pteromalidae occurring in Japan  
 178 (Hymenoptera). in *Studies on aphid hyperparasites of Japan, New Series 2. Insecta*  
 179 *Matsumurana*, 39-76 (1973).  
 180 6 Kavallieratos, N. G. *et al.* *Praon* Haliday (Hymenoptera : Braconidae : Aphidiinae) of  
 181 southeastern Europe: key, host range and phylogenetic relationships. *Zoologischer Anzeiger*  
 182 **243**, 181-209, doi:10.1016/j.jcz.2004.11.001 (2005).  
 183 7 Pennacchio, F. The Italian species of the genus *Aphidius* Nees (Hymenoptera, Braconidae,  
 184 Aphidiinae). *Bollettino del Laboratorio di Entomologia Agraria Filippo Silvestri* **46**, 75-106  
 185 (1990).  
 186 8 Starý, P. Biosystematic synopsis of parasitoids on cereal aphids in the Western Palaearctic  
 187 (Hymenoptera, Aphidiidae, Homoptera, Aphidoidea). *Acta Entomologica Bohemoslovaca* **78**,  
 188 382-396 (1981).  
 189 9 Starý, P. *Aphid parasites of Czechoslovakia. A review of the Czechoslovak Aphidiidae*  
 190 *(Hymenoptera)*. (Dr. W. Junk, 1966).  
 191 10 Graham, M. W. R. d. V. The Pteromalidae of north-western Europe (Hymenoptera:  
 192 Chalcidoidea). *Bulletin of the British Museum of Natural History (Entomology)* **Suppl. 16**  
 193 (1969).  
 194 11 Medvedev, G. S. (ed G. S. Medvedev) i-xii, 1-1341 (E.J. Brill, 1988).  
 195 12 Powell, W. The identification of hymenopterous parasitoids attacking cereal aphids in Britain.  
 196 *Systematic Entomology* **7**, 465-473, doi:10.1111/j.1365-3113.1982.tb00457.x (1982).  
 197 13 Tomanovic, Z. *et al.* *Aphidius* Nees aphid parasitoids (Hymenoptera, Braconidae, Aphidiinae)  
 198 in Serbia and Montenegro: tritrophic associations and key. *Acta Entomologica Serbica* **8**, 15-  
 199 39 (2003).  
 200 14 Takada, H. Parasitoids (Hymenoptera : Braconidae, Aphidiinae; Aphelinidae) of four principal  
 201 pest aphids (Homoptera : Aphididae) on greenhouse vegetable crops in Japan. *Applied*  
 202 *Entomology and Zoology* **37**, 237-249 (2002).  
 203 15 Japoshvili, G. & Abrantes, I. *Aphelinus* species (Hymenoptera : Aphelinidae) from the Iberian  
 204 Peninsula, with the description of one new species from Portugal. *Journal of Natural History*  
 205 **40**, 855-862, doi:10.1080/00222930600790737 (2006).



- 206 16 Luan, Y. X. *et al.* Ribosomal DNA gene and phylogenetic relationships of Diplura and lower  
207 Hexapods. *Science in China Series C-Life Sciences* **46**, 67-76, doi:10.1360/03yc9008 (2003).
- 208 17 Simon, C. *et al.* Evolution, weighting, and phylogenetic utility of mitochondrial gene-  
209 sequences and a compilation of conserved polymerase chain-reaction primers. *Annals of the*  
210 *Entomological Society of America* **87**, 651-701 (1994).
- 211 18 Kambhampati, S., Volkl, W. & Mackauer, M. Phylogenetic relationships among genera of  
212 Aphidiinae (Hymenoptera : Braconidae) based on DNA sequence of the mitochondrial 16S  
213 rRNA gene. *Systematic Entomology* **25**, 437-445, doi:10.1046/j.1365-3113.2000.00129.x  
214 (2000).
- 215 19 Kambhampati, S. & Smith, P. T. PCR primers for the amplification of four insect  
216 mitochondrial gene fragments. *Insect Molecular Biology* **4**, 233-236, doi:10.1111/j.1365-  
217 2583.1995.tb00028.x (1995).
- 218 20 Simon, C., Buckley, T. R., Frati, F., Stewart, J. B. & Beckenbach, A. T. Incorporating  
219 molecular evolution into phylogenetic analysis, and a new compilation of conserved  
220 polymerase chain reaction primers for animal mitochondrial DNA. *Annual Review of Ecology*  
221 *Evolution and Systematics* **37**, 545-579, doi:10.1146/annurev.ecolsys.37.091305.110018  
222 (2006).
- 223 21 Folmer, O., Black, M., Hoeh, W., Lutz, R. & Vrijenhoek, R. DNA primers for amplification of  
224 mitochondrial cytochrome c oxidase subunit I from diverse metazoan invertebrates. *Molecular*  
225 *Marine Biology and Biotechnology* **3**, 294-299 (1994).
- 226 22 Sint, D., Raso, L. & Traugott, M. Advances in multiplex PCR: balancing primer efficiencies  
227 and improving detection success. *Methods in Ecology and Evolution* **3**, 898-905,  
228 doi:10.1111/j.2041-210X.2012.00215.x (2012).
- 229 23 Sandström, J. P., Russell, J. A., White, J. P. & Moran, N. A. Independent origins and  
230 horizontal transfer of bacterial symbionts of aphids. *Molecular Ecology* **10**, 217-228,  
231 doi:10.1046/j.1365-294X.2001.01189.x (2001).
- 232 24 Russell, J. A. & Moran, N. A. Horizontal transfer of bacterial symbionts: Heritability and  
233 fitness effects in a novel aphid host. *Applied and Environmental Microbiology* **71**, 7987-7994,  
234 doi:10.1128/aem.71.12.7987-7994.2005 (2005).
- 235 25 Traugott, M. & Symondson, W. O. C. Molecular analysis of predation on parasitized hosts.  
236 *Bulletin of Entomological Research* **98**, 223-231, doi:10.1017/s0007485308005968 (2008).
- 237 26 Ferrari, J., West, J. A., Via, S. & Godfray, H. C. J. Population genetic structure and secondary  
238 symbionts in host-associated populations of the pea aphid complex. *Evolution* **66**, 375-390,  
239 doi:10.1111/j.1558-5646.2011.01436.x (2012).

240
